# Supplementary material for: Diastereoselective synthesis of highly functionalized cis-1-oxadecalines via 6-endo-tet-cyclizations of 2-C-branched sugars
Source: Royal Society of Chemistry journal article supplement (doi:10.1039/c4ra06554a), 2014-01-01

**Diastereoselective Synthesis of Highly Functionalized *cis*-1-Oxadecalines  
via 6-*endo-tet* cyclizations of 2-*C*- Branched sugars.**

Mallikharjuna Rao Lambu,<sup>1,2</sup> Debaraj Mukherjee\*<sup>1,2</sup>

<sup>1</sup>Academy of Scientific and Innovative Research, <sup>2</sup>CSIR-IIIM

Corresponding authors: Tel.: (+) 91-011-256-9000, Fax: (+)-91-011-256-9111.  
email.dmukherjee@iiim.ac.in.

Contents

Copies of <sup>1</sup>H NMR and <sup>13</sup>C NMR of compounds **6-13** 2-13

**Table 1:** Standardization of the reaction for the synthesis of 1-oxadecaline.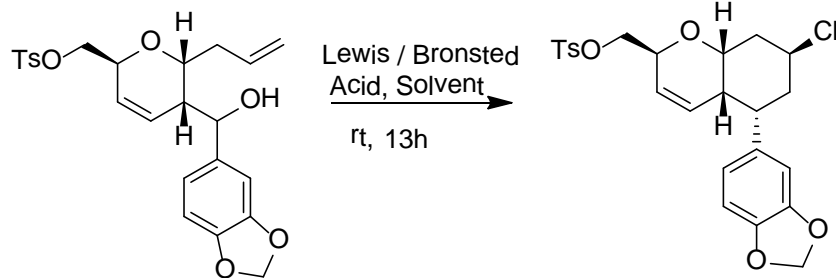

| Entry | Lewis acid (mmol)                           | Solvent | Yield (%)    |
|-------|---------------------------------------------|---------|--------------|
| 1     | FeCl <sub>3</sub> (1.0)                     | DCM     | 30           |
| 2     | FeCl <sub>3</sub> (0.75)                    | DCM     | 43           |
| 3     | FeCl <sub>3</sub> (0.5)                     | DCM     | 68           |
| 4     | FeCl <sub>3</sub> (0.33)                    | DCM     | 50           |
| 5     | FeCl <sub>3</sub> (0.20)                    | DCM     | 28           |
| 6     | FeCl <sub>3</sub> (0.50)                    | ACN     | Nd           |
| 7     | FeCl <sub>3</sub> (1.0)                     | THF     | Trace amount |
| 8     | FeCl <sub>3</sub> (0.50)                    | DCE     | 58           |
| 9     | BF <sub>3</sub> .Et <sub>2</sub> O (0.33/)  | ACN     | Nd           |
| 10    | TFA (1.0 equiv.)                            | DCM     | Nd           |
| 11    | CeCl <sub>3</sub> .7H <sub>2</sub> O (0.50) | ACN     | Nd           |

**<sup>1</sup>H NMR of compound 6 (400 MHz, CDCl<sub>3</sub>).**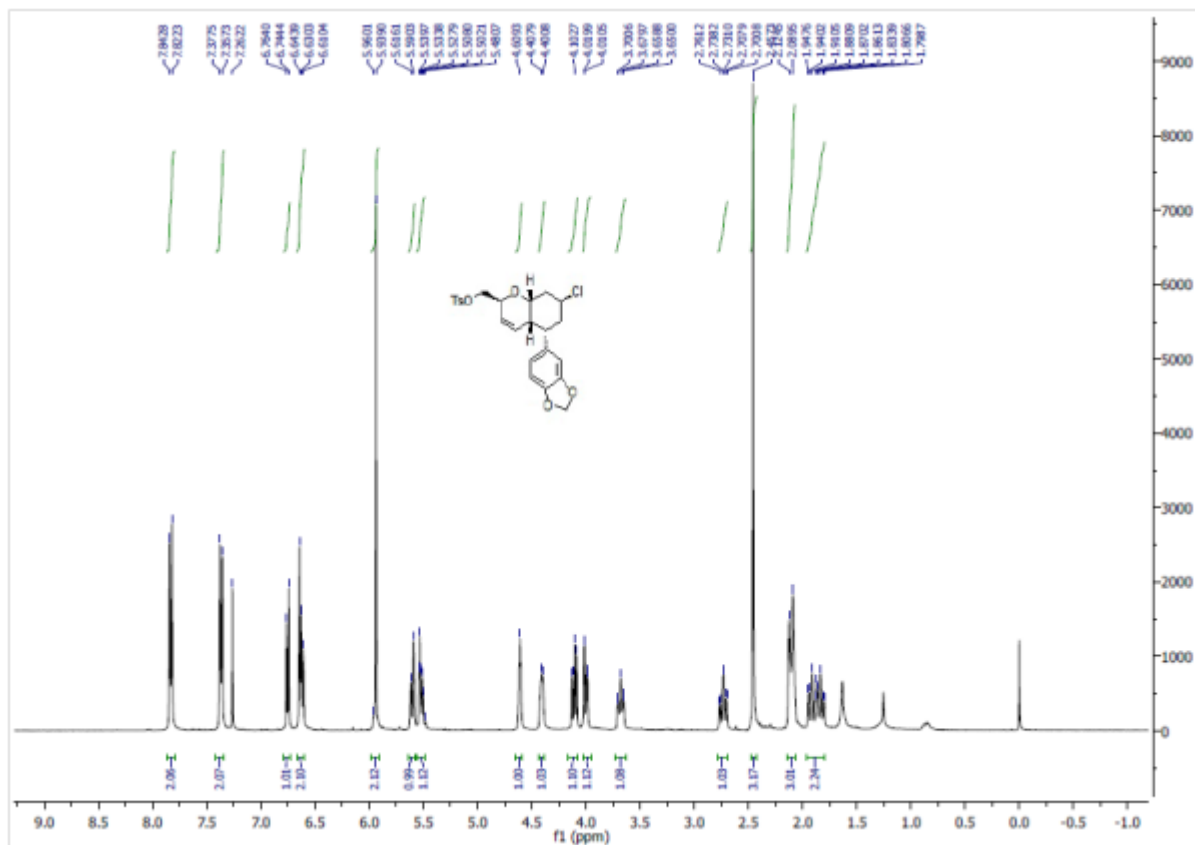

**$^{13}\text{C}$  NMR of compound 6 (126 MHz,  $\text{CDCl}_3$ ).**

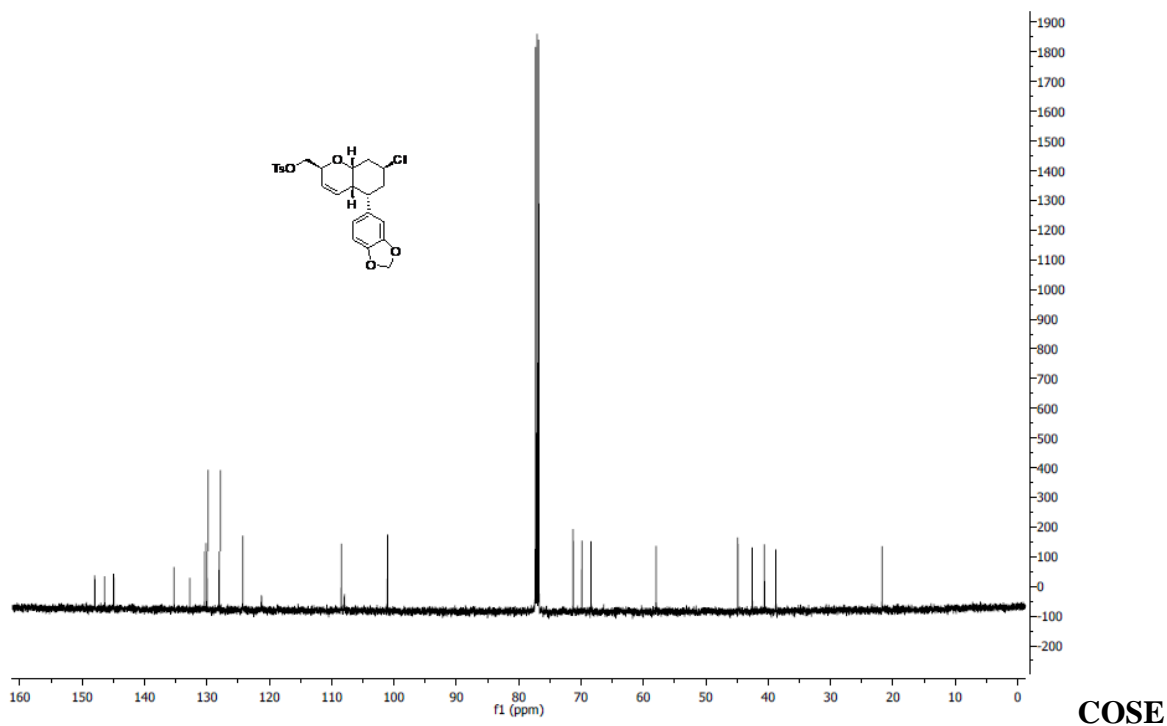

**Y of compound 6.**

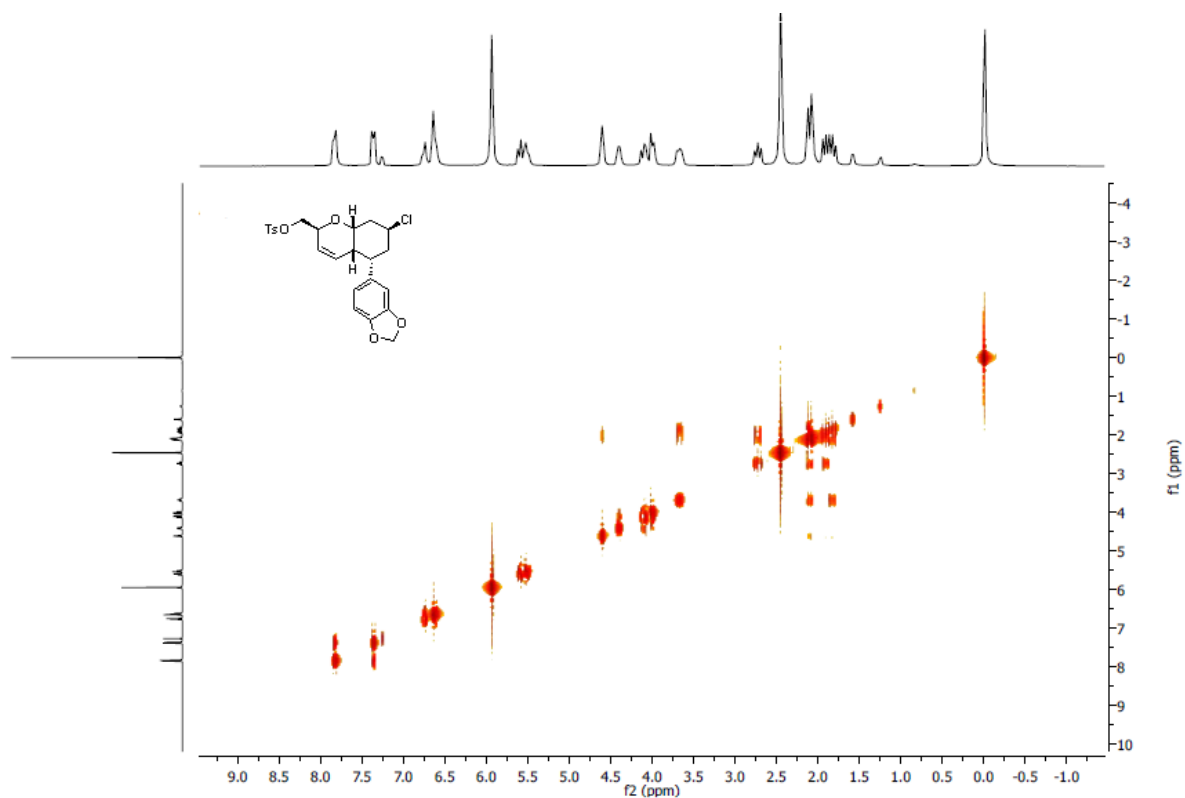

### HSQC compound 6.

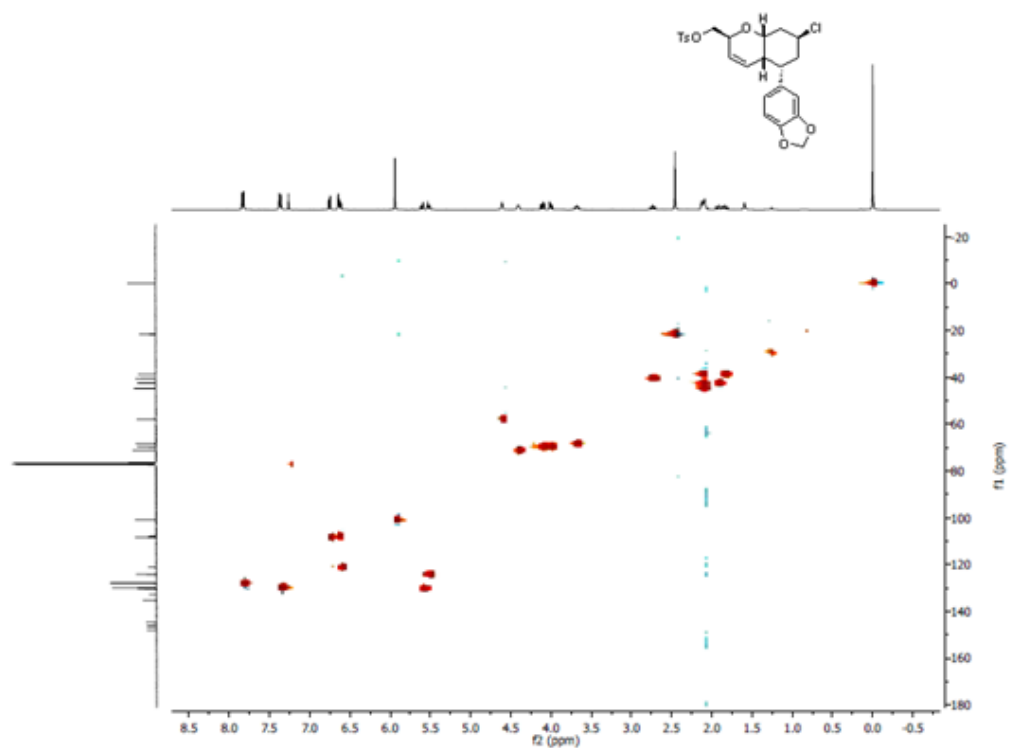

### HMBC of compound 6.

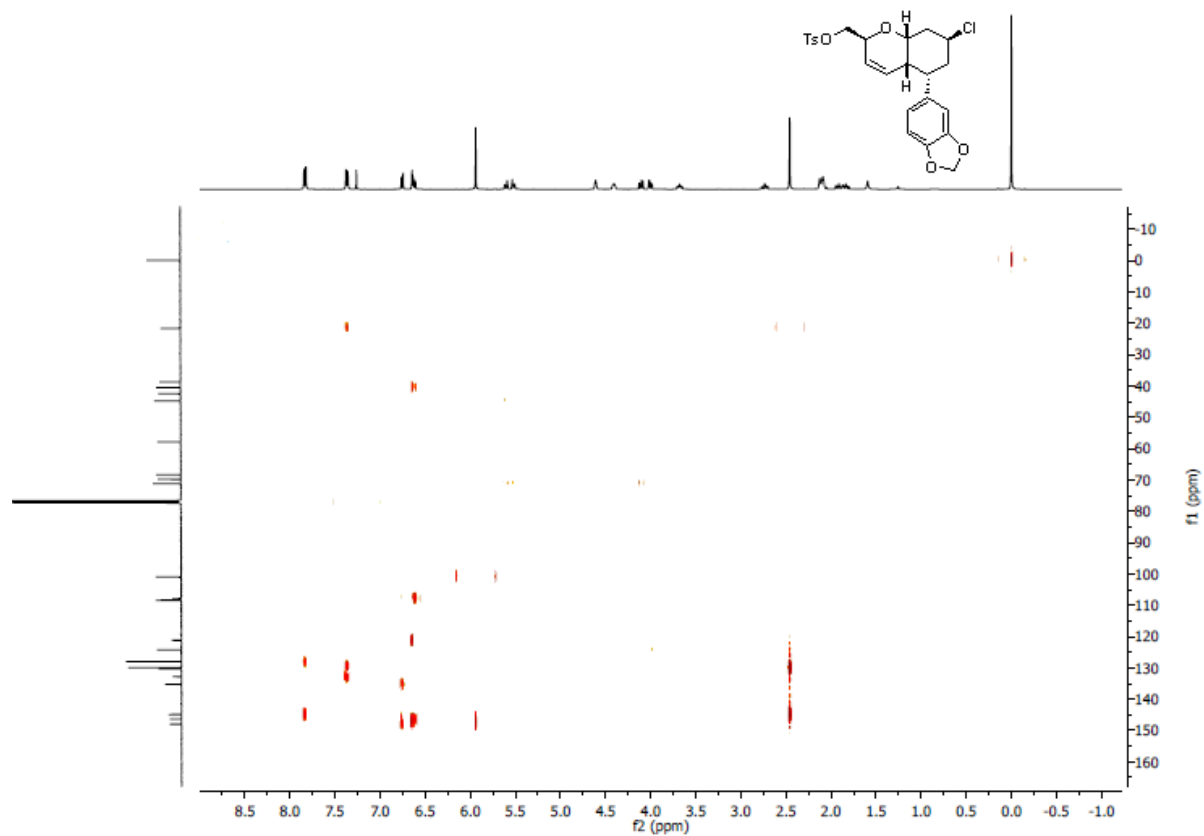

**NOSEY of compound 6.**

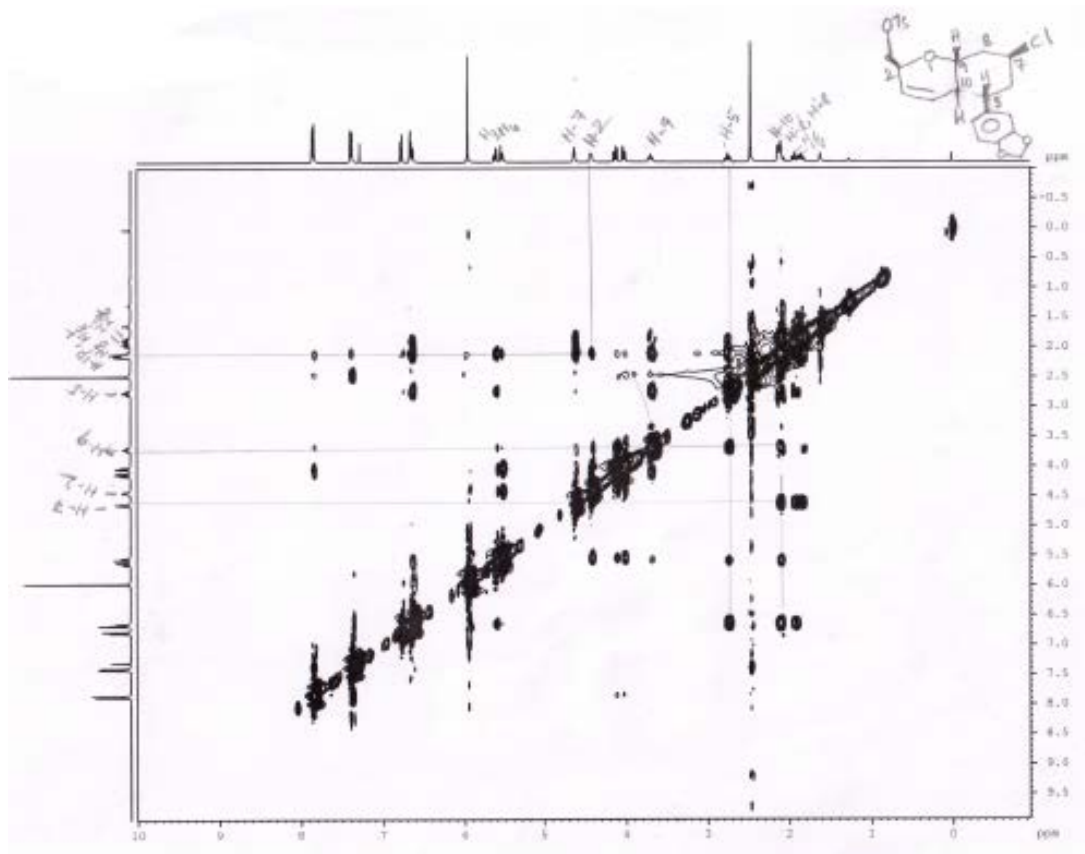

**<sup>1</sup>H NMR of compound 7 (400 MHz, CDCl<sub>3</sub>).**

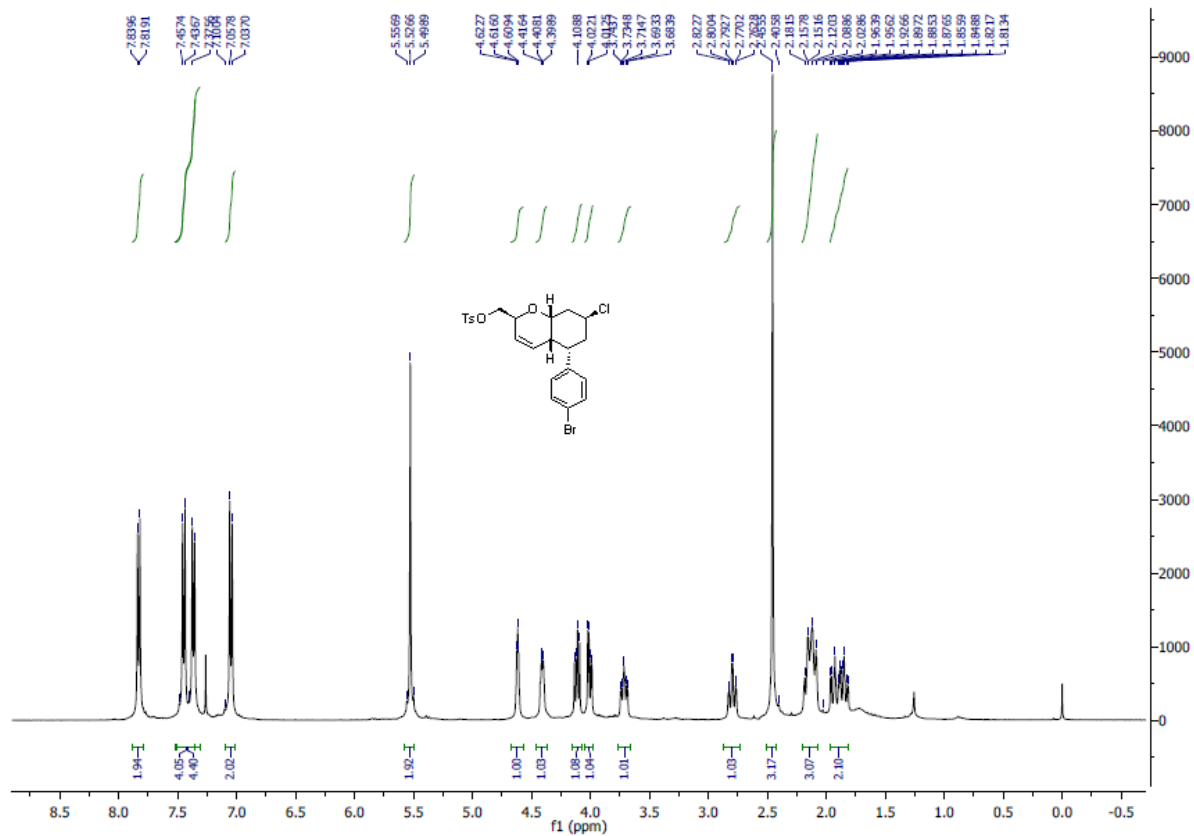

**<sup>13</sup>C NMR of compound 7 (126 MHz, CDCl<sub>3</sub>).**

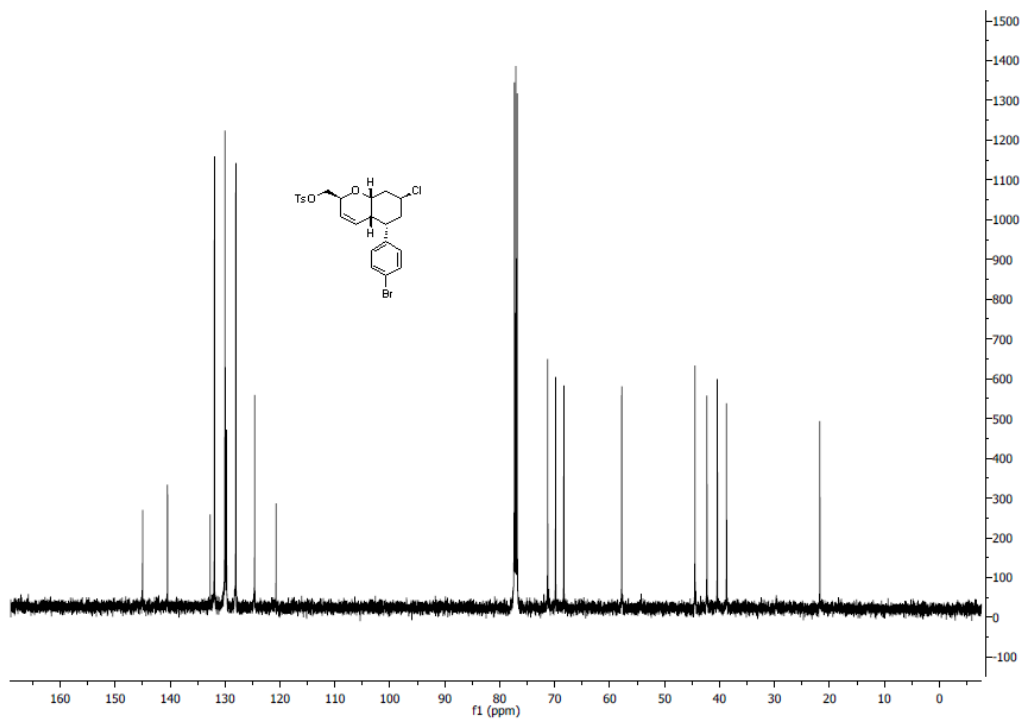

**<sup>1</sup>H NMR of compound 8 (400 MHz, CDCl<sub>3</sub>).**

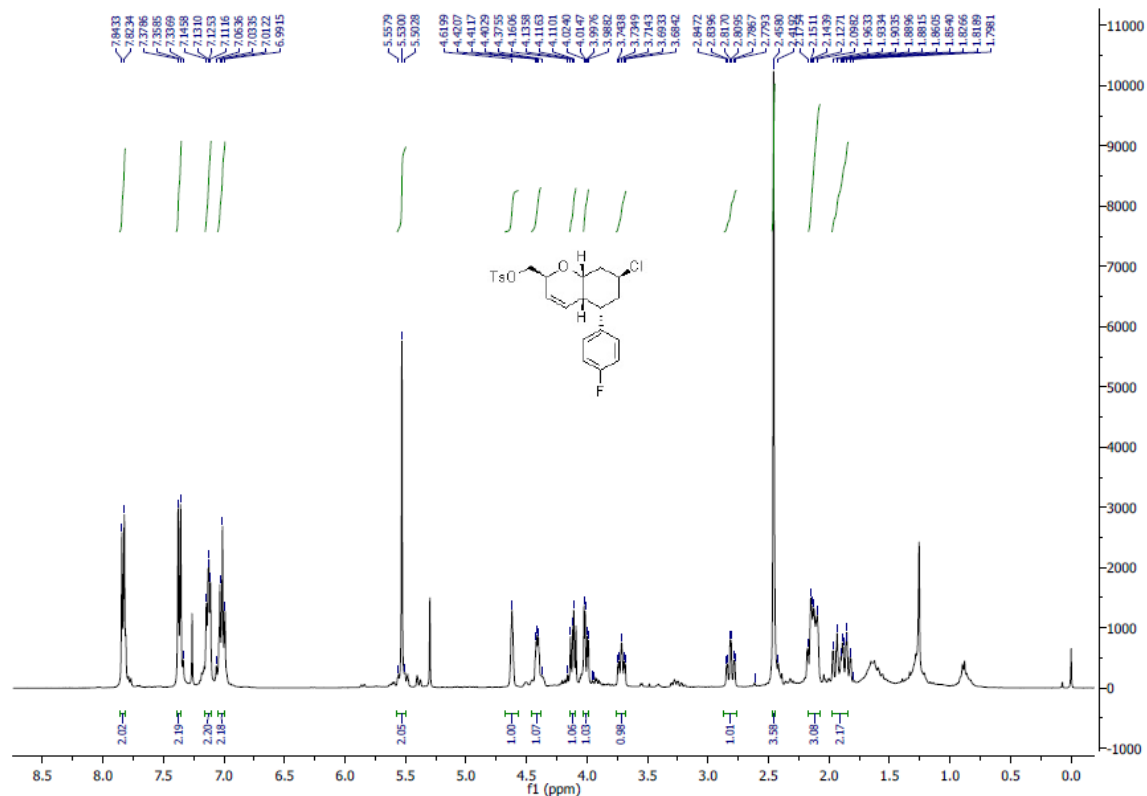

**<sup>13</sup>C NMR of compound 8 (126 MHz, CDCl<sub>3</sub>).**

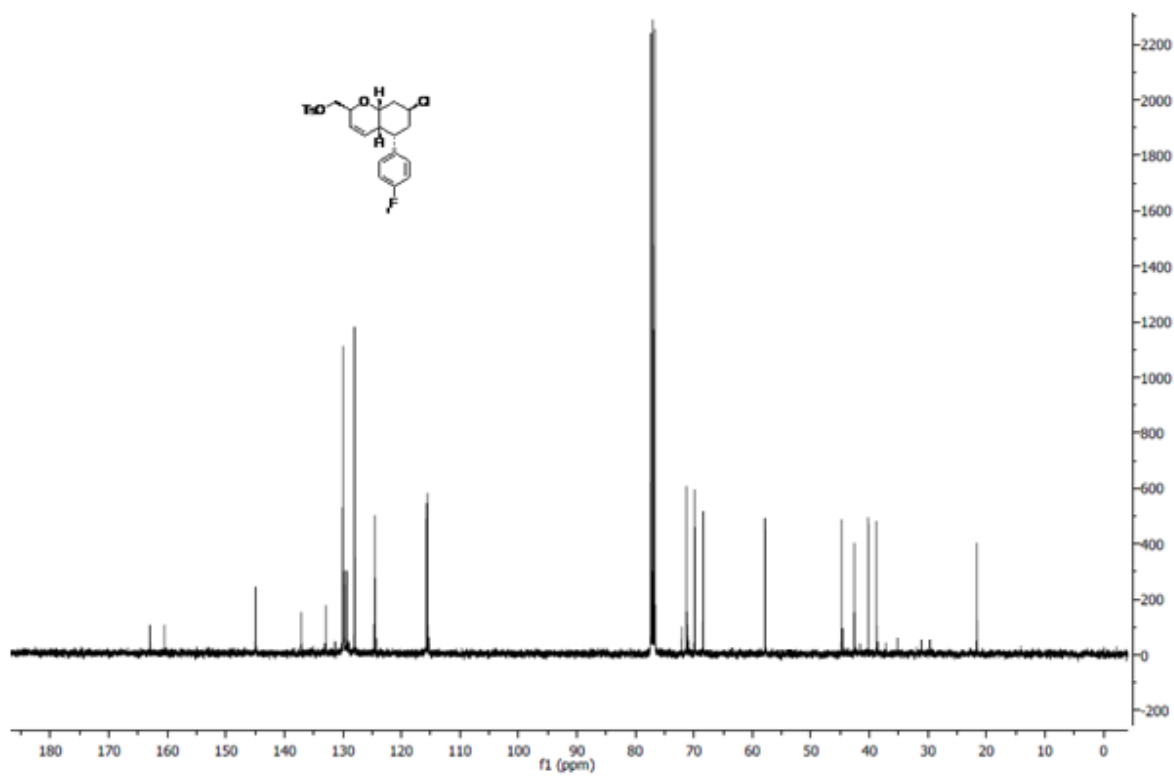

**<sup>1</sup>H NMR of compound 9 (400MHz, CDCl<sub>3</sub>).**

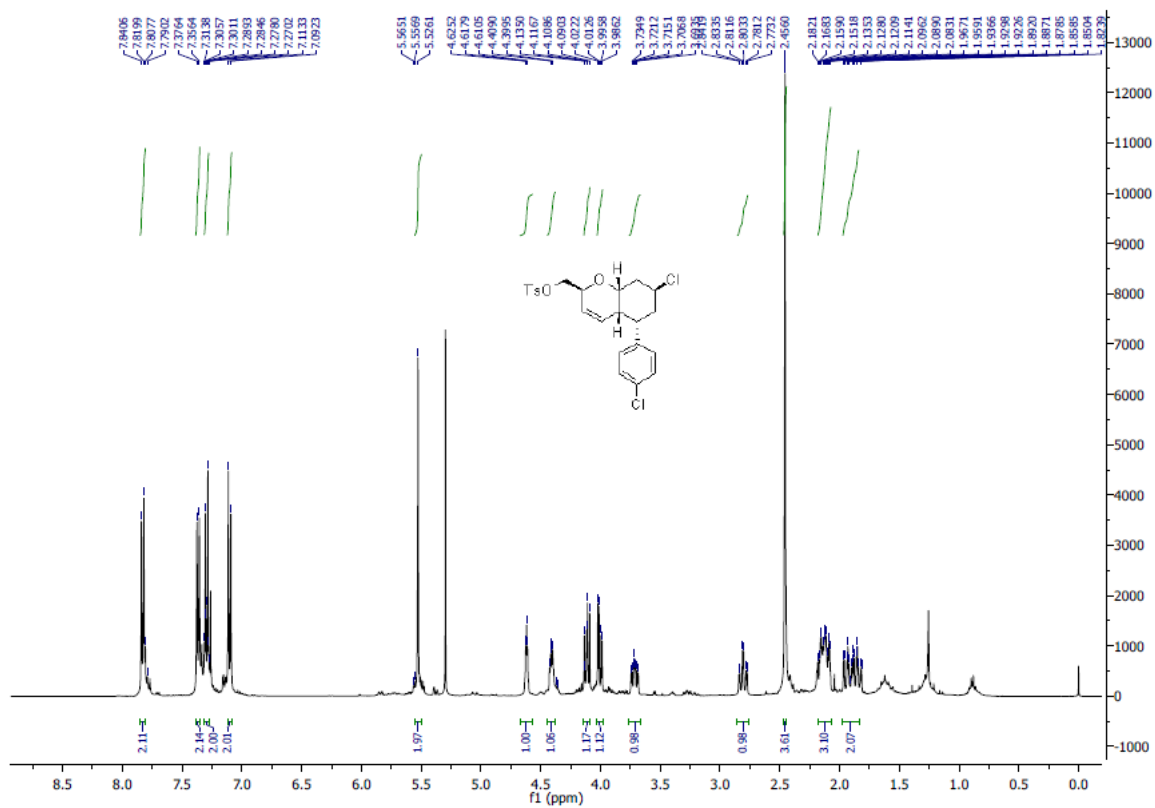

**<sup>13</sup>C NMR of compound 9 (126 MHz, CDCl<sub>3</sub>).**

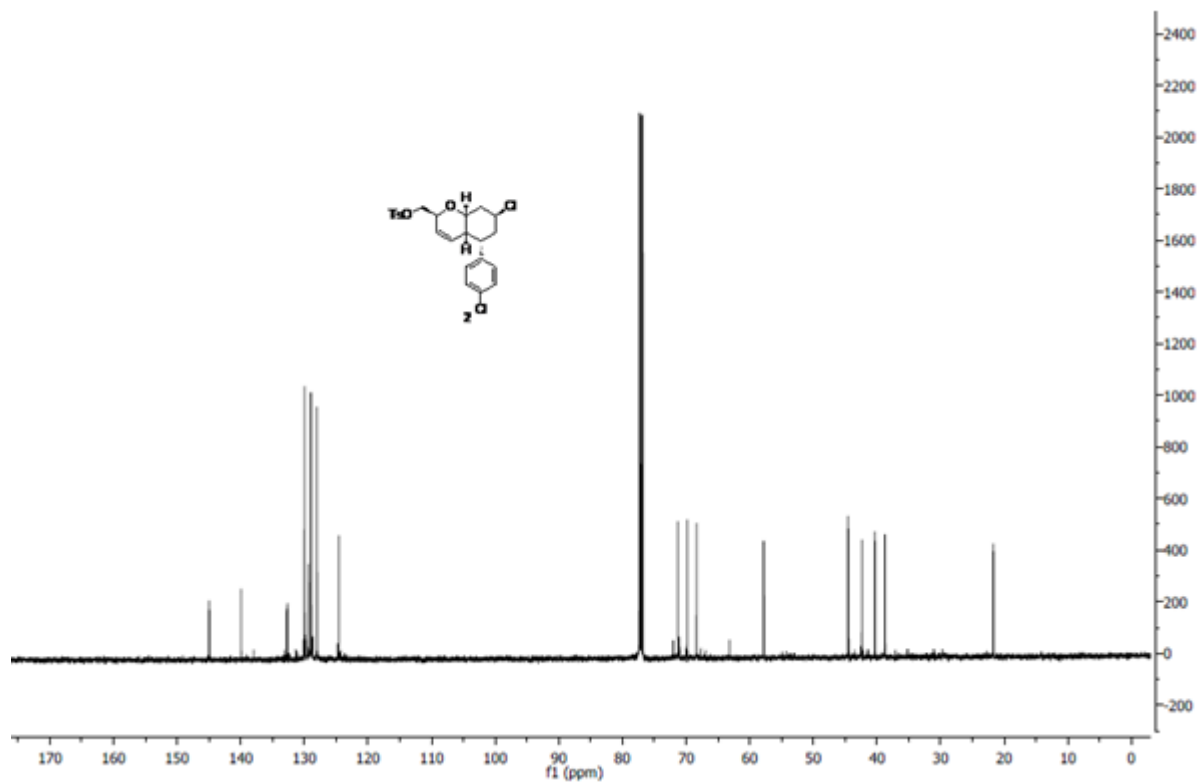



### <sup>1</sup>H NMR of compound 10 (400MHz, CDCl<sub>3</sub>).

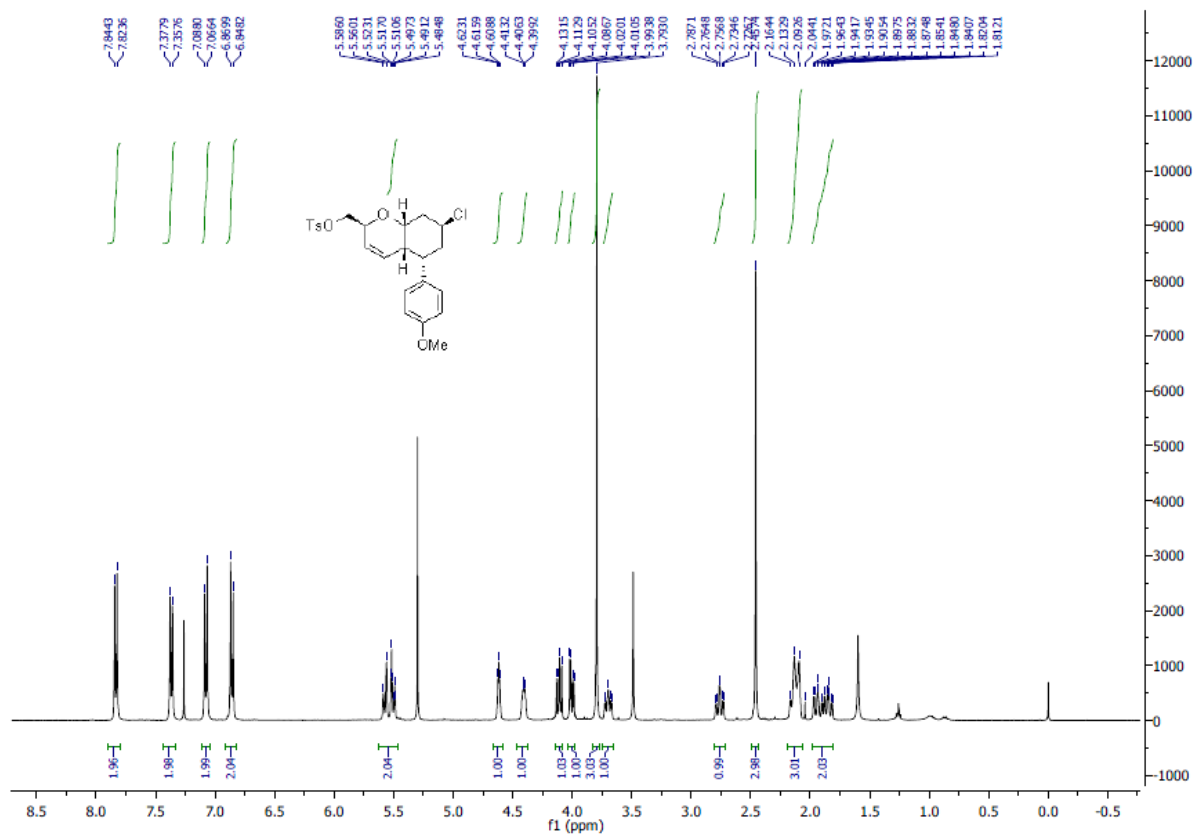

### <sup>13</sup>C NMR of compound 10 (126 MHz, CDCl<sub>3</sub>).

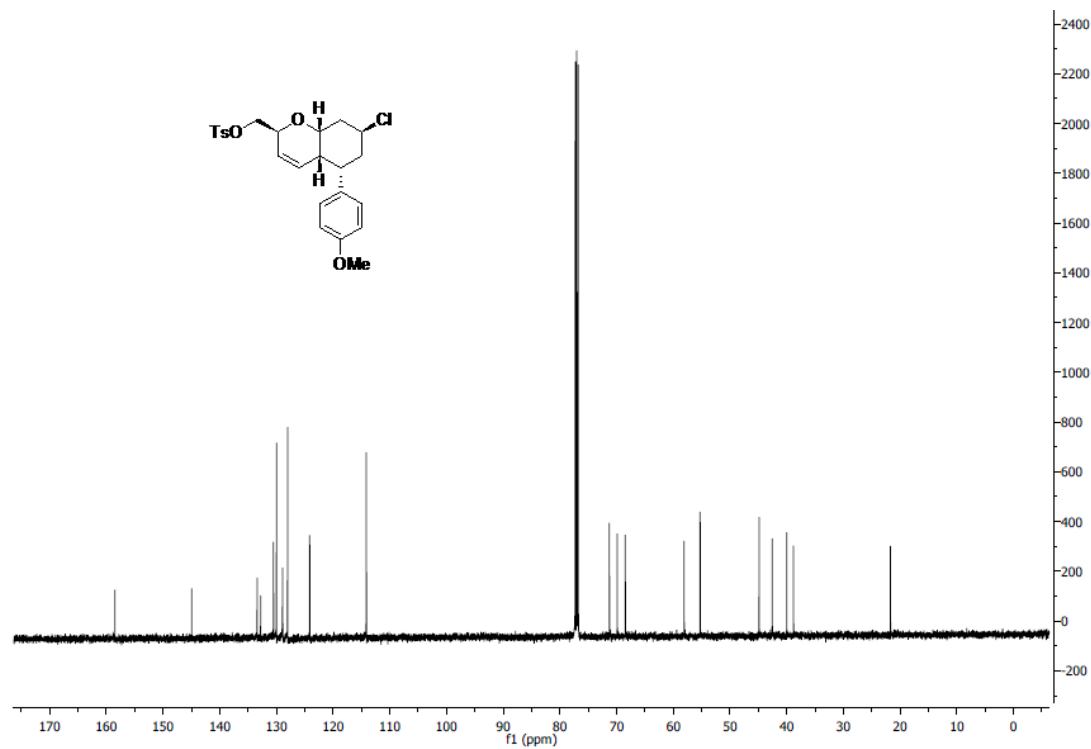

**<sup>1</sup>H NMR of compound 11 (400 MHz, CDCl<sub>3</sub>).**

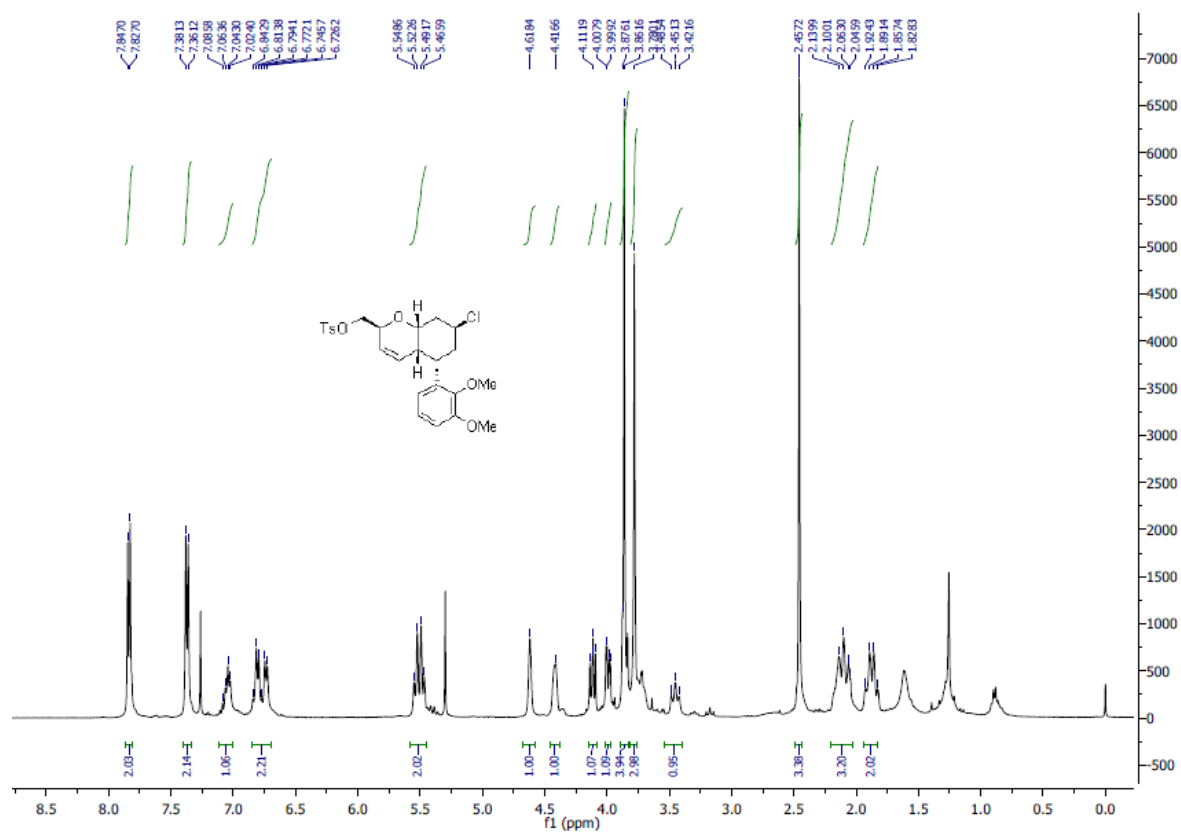

**<sup>13</sup>C NMR of compound 11 (126 MHz, CDCl<sub>3</sub>).**

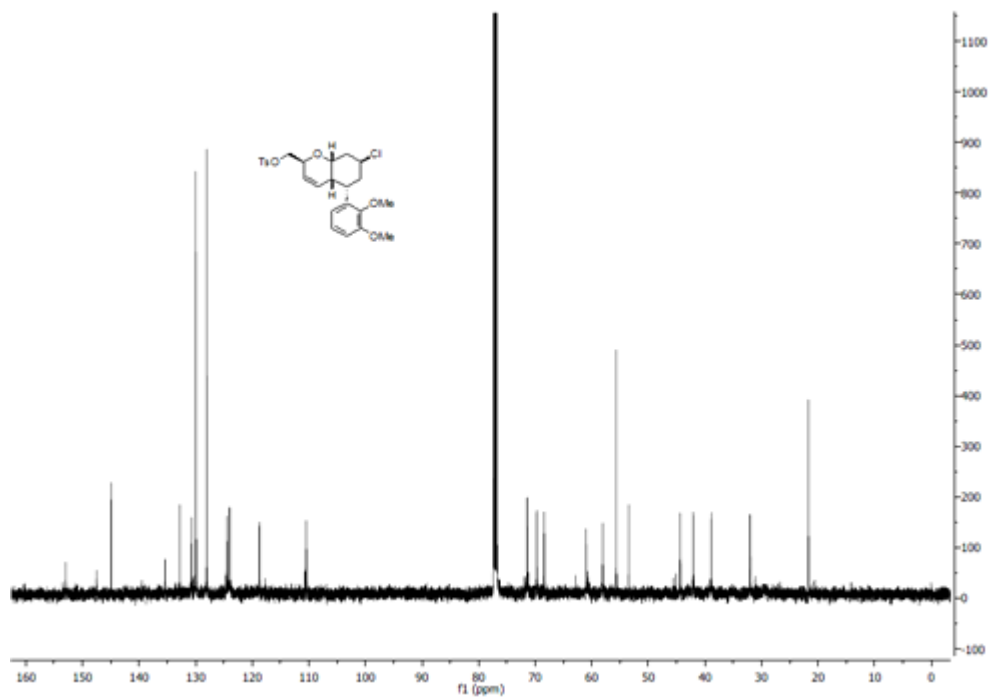

**<sup>1</sup>H NMR of compound 12 (400 MHz, CDCl<sub>3</sub>).**

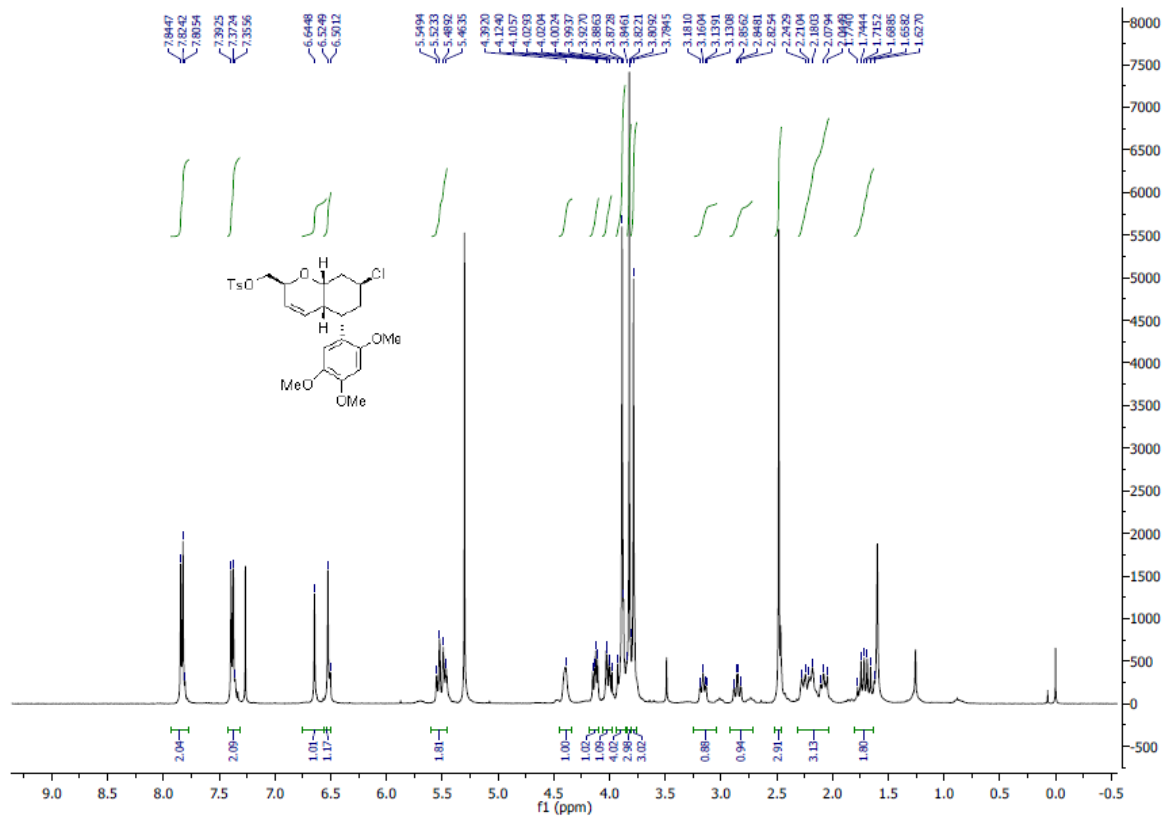

**<sup>13</sup>C NMR of compound 12 (126 MHz, CDCl<sub>3</sub>).**

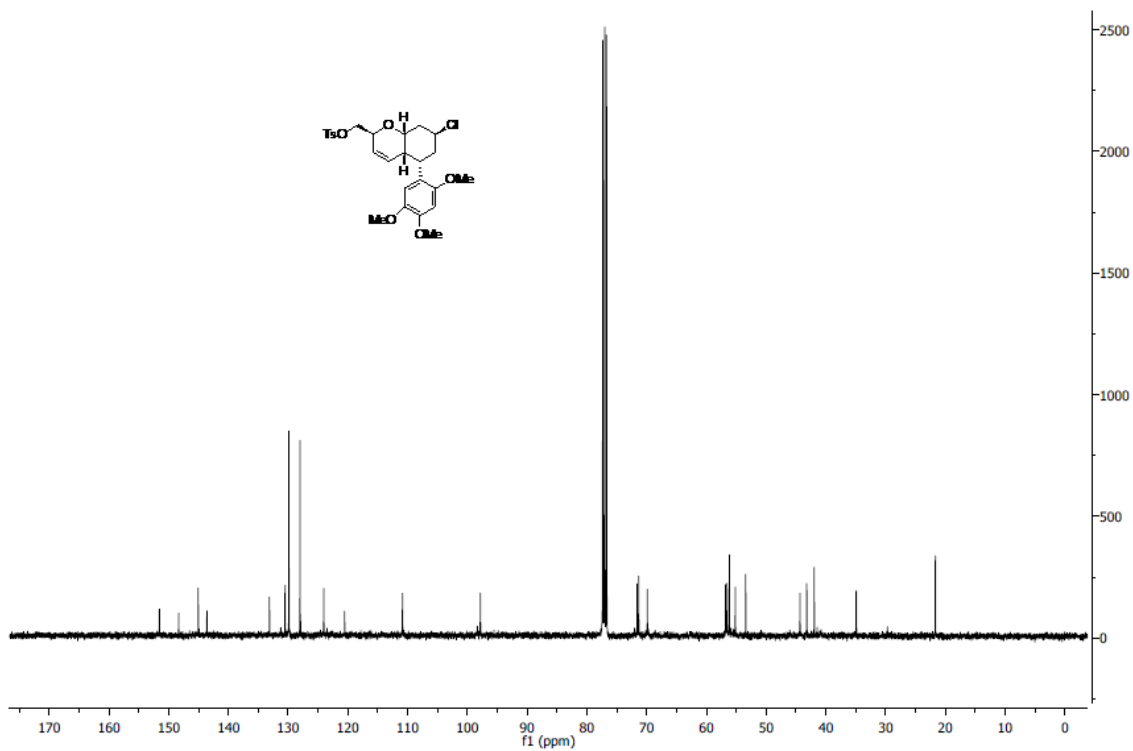

### DEPT of the compound 12 (126 MHz, CDCl<sub>3</sub>)

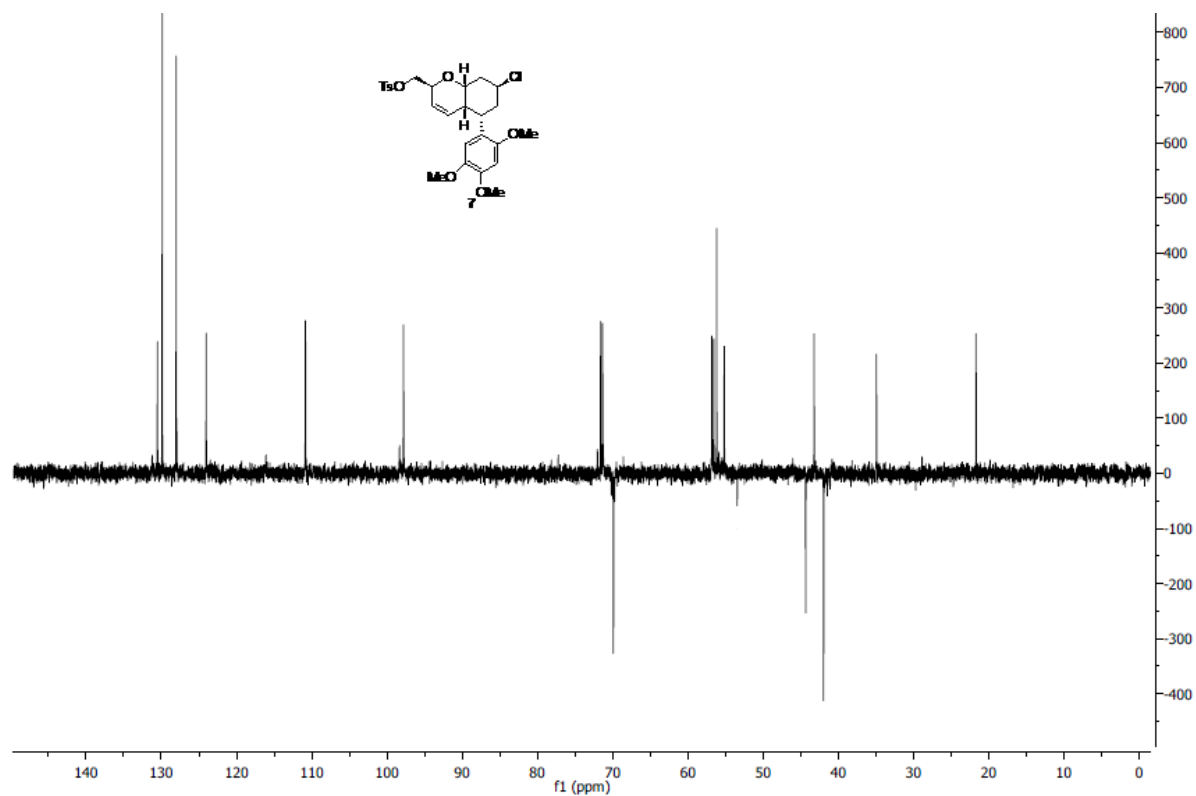

### <sup>1</sup>H NMR of compound 13

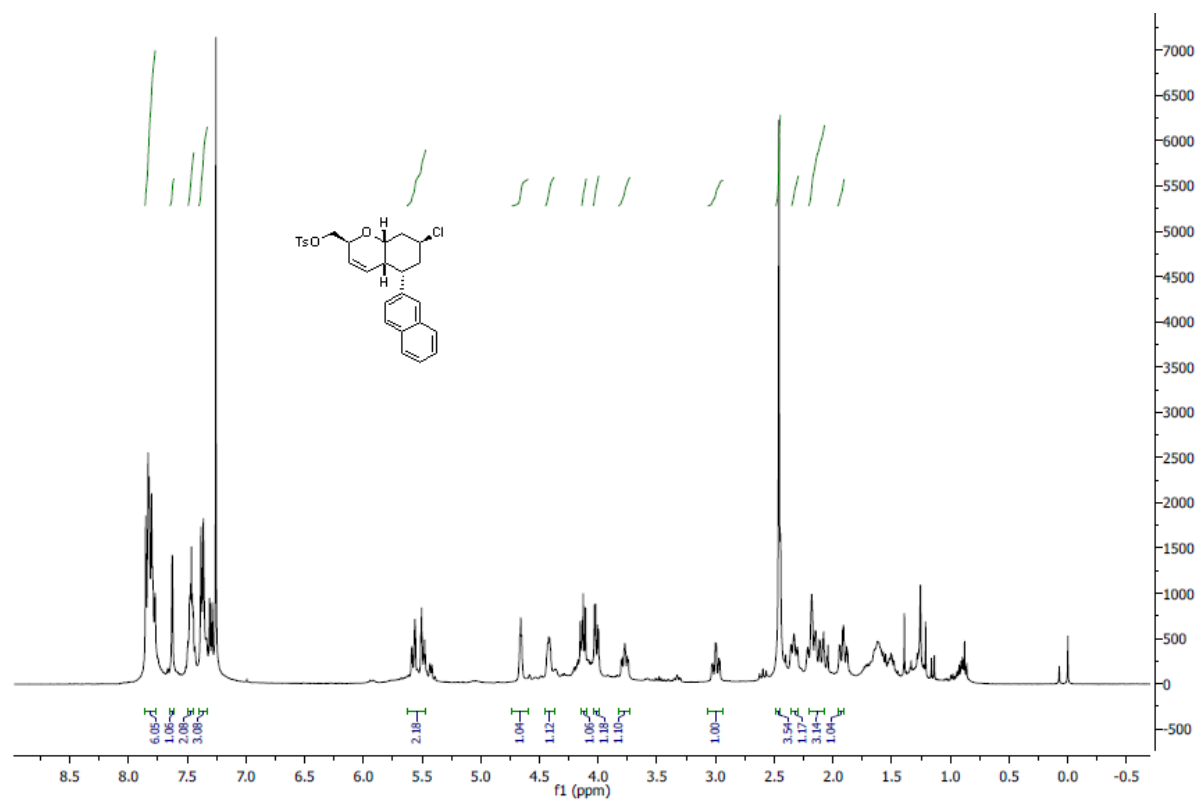

<sup>13</sup>C NMR of compound 13

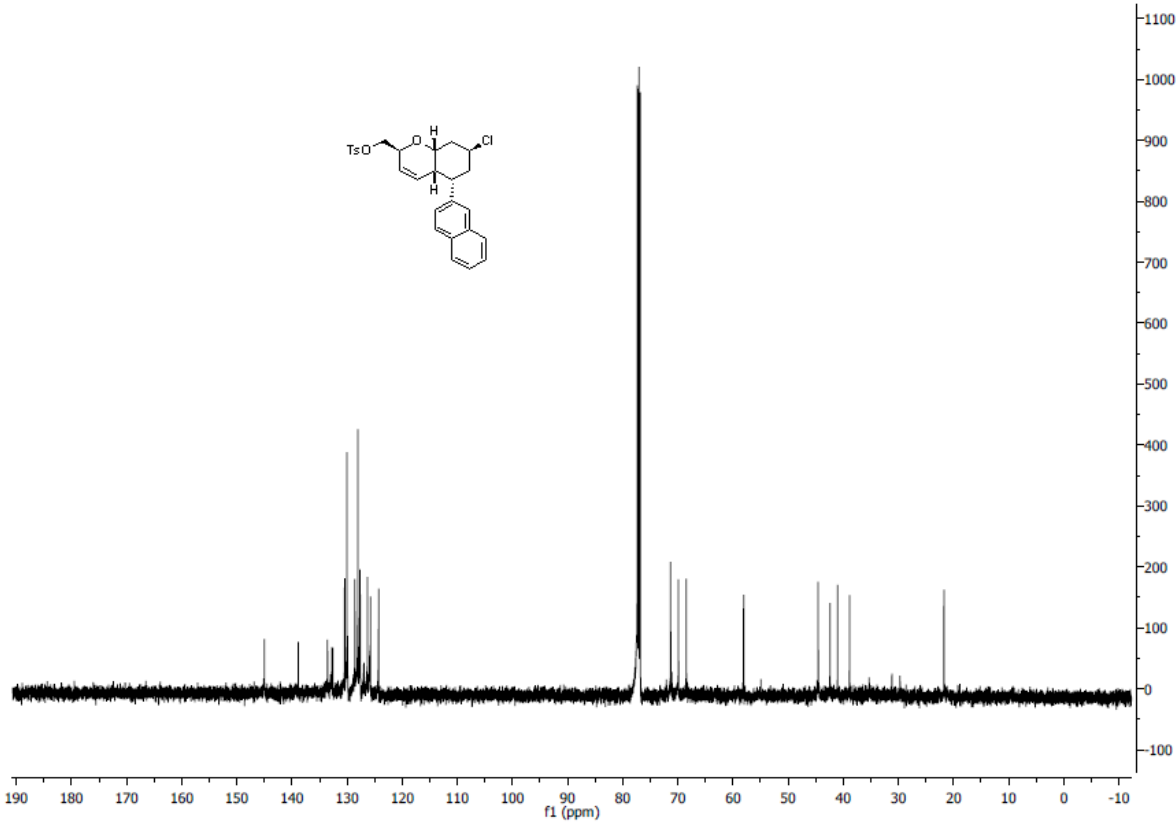

Supplement: c4ra06554a1.pdf [file c4ra06554a1.pdf]
